# Supplementary material for: Postpartum depression screening in mothers and fathers at well-child visits: a feasibility study within the NASCITA cohort
Source: HighWire-hosted journal article supplement (doi:10.1136/bmjopen-2022-069797), 2023-06-01
Supplement: bmjopen-2022-069797supp001_data_supplement.pdf [file bmjopen-2022-069797supp001_data_supplement.pdf]

**Table 1: Sociodemographic characteristics of the families involved in the study, compared to those of families included in the NASCITA Cohort but excluded from this study.**

| Variable                       |        | Assessable   | Not assessable | p-value |
|--------------------------------|--------|--------------|----------------|---------|
| Total                          |        | 2.731        | 2.323          |         |
| Geographical area of residence | North  | 1.266 (46.4) | 1.074 (46.2)   | 0.0096* |
|                                | Centre | 491 (18.0)   | 489 (21.1)     |         |
|                                | South  | 974 (35.7)   | 760 (32.7)     |         |
| Setting                        | Urban  | 1.037 (38.0) | 958 (41.3)     | 0.0171* |
|                                | Rural  | 1.693 (62.0) | 1.363 (58.7)   |         |
| Maternal age at delivery       | <30    | 654 (24.5)   | 562 (24.8)     | 0.6973  |
|                                | 30-34  | 972 (36.4)   | 797 (35.2)     |         |
|                                | 35+    | 1.046 (39.1) | 904 (39.9)     |         |
| Paternal age at delivery       | <30    | 370 (14.0)   | 296 (13.1)     | 0.5771  |
|                                | 30-34  | 714 (27.0)   | 598 (26.5)     |         |
|                                | 35+    | 1.565 (59.1) | 1.363 (60.4)   |         |
| Employed mother                | Yes    | 1.929 (71.1) | 1.567 (68.0)   | 0.0198* |
|                                | No     | 785 (28.9)   | 736 (32.0)     |         |
| Employed father                | Yes    | 2.600 (96.4) | 2.196 (95.9)   | 0.3478  |
|                                | No     | 98 (3.6)     | 95 (4.1)       |         |
| Both parents employed          | Yes    | 49 (1.8)     | 54 (2.4)       | 0.1777  |
|                                | No     | 2.643 (98.2) | 2.228 (97.6)   |         |
| Single mother                  | Yes    | 32 (1.2)     | 39 (1.7)       | 0.1276  |
|                                | No     | 2.697 (98.8) | 2.284 (98.3)   |         |
| Single father                  | Yes    | 24 (0.9)     | 32 (1.4)       | 0.0918  |
|                                | No     | 2.696 (99.1) | 2.283 (98.6)   |         |

|                                                 |      |               |              |         |
|-------------------------------------------------|------|---------------|--------------|---------|
| Maternal educational level                      | Low  | 395 (14.6)    | 396 (17.3)   | 0.0104* |
|                                                 | High | 2.308 (85.4)  | 1.897 (82.7) |         |
| Paternal educational level                      | Low  | 621 (23.2)    | 534 (23.6)   | 0.7616  |
|                                                 | High | 2.057 (76.8)  | 1.733 (76.4) |         |
| Only child                                      | Yes  | 1.482 (54.3)  | 1.228 (52.9) | 0.3221  |
|                                                 | No   | 1.246 (45.7)  | 1.092 (47.1) |         |
| Maternal psychiatric condition during pregnancy | Yes  | 22 (0.8)      | 11 (0.5)     | 0.1441  |
|                                                 | No   | 2.709 (99.2)  | 2.312 (99.5) |         |
| Any psychiatric disorder in maternal family     | Yes  | 26 (1.0)      | 18 (0.8)     | 0.4992  |
|                                                 | No   | 2.705 (99.0)  | 2.305 (99.2) |         |
| Paternal psychiatric condition                  | Yes  | -             | 2 (0.1)      | 0.2112  |
|                                                 | No   | 2.731 (100.0) | 2.321 (99.9) |         |
| Any psychiatric disorder in paternal family     | Yes  | 27 (1.0)      | 14 (0.6)     | 0.1274  |
|                                                 | No   | 2.704 (99.0)  | 2.309 (99.4) |         |

**Table 2 – Association between paternal and neonatal characteristics and paternal postnatal depression.**

| Variable                       |               | Paternal postnatal depression            |                                  | OR (95% CI)         | p-value |
|--------------------------------|---------------|------------------------------------------|----------------------------------|---------------------|---------|
|                                |               | <i>Likely depressed father</i><br>(N=18) | <i>Not depressed</i><br>(N=2090) |                     |         |
| Geographical area of residence | <i>North</i>  | 12 (66.7)                                | 887                              | 2.77<br>(0.89-8.62) | 0.07    |
|                                | <i>Centre</i> | 2 (11.1)                                 | 384                              | 1.07<br>(0.19-5.85) | 0.94    |
|                                | <i>South</i>  | 4 (22.2)                                 | 819                              | 1                   |         |
| Setting                        | <i>Urban</i>  | 3 (16.7)                                 | 827                              | 0.31                | 0.06    |

|                                                    |                     |           |             |                      |            |
|----------------------------------------------------|---------------------|-----------|-------------|----------------------|------------|
|                                                    |                     |           |             | (0.09-1.06)          |            |
|                                                    | <i>Rural</i>        | 15 (83.3) | 1262        | 1                    |            |
| Paternal age at delivery                           | <30                 | 2 (11.1)  | 280 (13.8)  | 1.01<br>(0.18-5.52)  | 0.99       |
|                                                    | 30-34               | 4 (22.2)  | 563 (27.7)  | 1                    |            |
|                                                    | ≥35                 | 12 (66.7) | 1201 (58.6) | 1.42<br>(0.46-4.42)  | 0.54       |
| Educational level**                                | <i>Low</i>          | 4 (22.2)  | 478 (23.2)  | 0.95<br>(0.31-2.89)  | 0.92       |
|                                                    | <i>High</i>         | 14 (77.8) | 1585 (76.8) | 1                    |            |
| Employment status                                  | <i>Employed</i>     | 16 (88.9) | 2001 (96.4) | 0.30<br>(0.07-1.33)  | 0.11       |
|                                                    | <i>Unemployed</i>   | 2 (11.1)  | 75 (3.6)    | 1                    |            |
| Marital status                                     | <i>Single</i>       | -         | 8           |                      | -          |
|                                                    | <i>With partner</i> | 18 (100)  | 2082 (99.6) |                      | 1          |
| Father smoker                                      | <i>Yes</i>          | 5 (27.8)  | 514 (24.7)  | 1.17<br>(0.42-3.31)  | 0.76       |
|                                                    | <i>No</i>           | 13 (72.2) | 1569 (75.3) | 1                    |            |
| Paternal chronic conditions                        | <i>Yes</i>          | 4 (22.2)  | 274 (13.1)  | 1.89<br>(0.62-5.79)  | 0.26       |
|                                                    | <i>No</i>           | 14 (77.8) | 1816 (86.9) | 1                    |            |
| First time fathers                                 | <i>Yes</i>          | 11 (61.1) | 1133 (54.3) | 1.32 (0.51-3.43)     | 0.56       |
|                                                    | <i>No</i>           | 7 (38.9)  | 954 (45.7)  | 1                    |            |
| Newborn gender                                     | <i>Male</i>         | 9 (50)    | 1077 (51.5) | 1                    | 0.90       |
|                                                    | <i>Female</i>       | 9 (50)    | 1013 (48.5) | 1.06<br>(0.42-2.69)  |            |
| Preterm birth (37 weeks)                           | <i>Yes</i>          | -         | 126 (6)     | -                    | 0.30       |
|                                                    | <i>No</i>           | 18 (100)  | 1963 (94)   | 1                    |            |
| Child hospitalized in the NICU for at least 7 days | <i>Yes</i>          | 1 (5.6)   | 38 (1.8)    | 3.16<br>(0.41-24.34) | 0.27       |
|                                                    | <i>No</i>           | 17 (94.4) | 2040 (98.2) | 1                    |            |
| Child sleeping disorders at second visit           | <i>Yes</i>          | 7 (38.9)  | 160 (7.7)   | 7.64<br>(2.92-19.97) | < 0.0001 * |

|                                                                       |     |           |             |                      |            |
|-----------------------------------------------------------------------|-----|-----------|-------------|----------------------|------------|
| (2-3 months after childbirth)                                         | No  | 11 (61.1) | 1920 (92.3) | 1                    |            |
| Child sleeping disorders at third visit (5-7 months after childbirth) | Yes | 7 (38.9)  | 309 (14.8)  | 3.66<br>(1.41-9.50)  | 0.007*     |
|                                                                       | No  | 11 (61.1) | 1775 (85.2) | 1                    |            |
| Depressed mother                                                      | Yes | 12 (75)   | 62 (3.4)    | 85.53 (26.83-272.69) | < 0.0001 * |
|                                                                       | No  | 4 (25)    | 1768 (96.6) |                      |            |

\* *p*-value of chi-square for trend test. \*\*Educational level: low: no schooling or primary versus high: secondary school or university.
